# Supplementary material
Source: publisher figshare collection journal article supplement (https://asha.figshare.com/articles/dataset/_/26017978)
Supplement: Supplementary file 1 [file 1]

**Supplemental Material S7.** CELFP-2 risk for development language disorder (-1.0 SD from the mean) fall with spring modified CLI.

|                      |             | Risk for DLD Spring Modified CELFP-2 CLI |            |            |
|----------------------|-------------|------------------------------------------|------------|------------|
|                      |             | Not At-Risk                              | At-Risk    | Total      |
| Risk for DLD Fall    | Not At-Risk | 192 (94.6%)                              | 11 (5.4%)  | 203 (100%) |
| Modified CELFP-2 CLI | At-Risk     | 39 (50.0%)                               | 39 (50.0%) | 78 (100%)  |
|                      | Total       | 231 (82.2%)                              | 50 (17.8%) | 281 (100%) |

*Note.* CELFP-2 = Clinical Evaluation of Language Fundamentals Preschool–Second Edition; CLI = Core Language Index; DLD = developmental language disorder.
