# Supplementary material
Source: publisher figshare collection journal article supplement (https://asha.figshare.com/articles/dataset/_/26017978)
Supplement: Supplementary file 2 [file 1]

**Supplemental Material S6.** CELFP-2 risk for developmental language disorder (-1.0 *SD* from the mean) in fall with spring unmodified CLI.

|                        |             | Risk for DLD Spring Unmodified CELFP-2 CLI |            |            |
|------------------------|-------------|--------------------------------------------|------------|------------|
|                        |             | Not At-Risk                                | At-Risk    | Total      |
| Risk for DLD Fall      | Not At-Risk | 155 (92.8%)                                | 12 (7.2%)  | 167 (100%) |
| Unmodified CELFP-2 CLI | At-Risk     | 46 (40.4%)                                 | 68 (59.6%) | 114 (100%) |
|                        | Total       | 201 (71.5%)                                | 80 (28.5%) | 281 (100%) |

*Note.* CELFP-2 = Clinical Evaluation of Language Fundamentals Preschool–Second Edition; CLI = Core Language Index; DLD = developmental language disorder.
