# Supplementary material
Source: publisher figshare collection journal article supplement (https://asha.figshare.com/articles/dataset/_/26017978)
Supplement: Supplementary file 3 [file 1]

**Supplemental Material S5.** DELV-ST diagnostic risk status by DELV-ST language variation status.

| DELV-ST Part I<br>Language Variation<br>Status | DELV-ST Part II Diagnostic Risk Status |                       |                        |           | Total |
|------------------------------------------------|----------------------------------------|-----------------------|------------------------|-----------|-------|
|                                                | Lowest Risk                            | Low to<br>Medium Risk | Medium to<br>High Risk | High Risk |       |
| Strong Variation                               | 51                                     | 27                    | 59                     | 85        | 222   |
| Some Variation                                 | 8                                      | 4                     | 7                      | 13        | 32    |
| GAE                                            | 15                                     | 3                     | 8                      | 4         | 30    |
| Total                                          | 74                                     | 34                    | 74                     | 102       | 284   |

*Note.* DELV-ST = Diagnostic Evaluation of Language Variation–Screening Test; GAE = General American English.
